# Supplementary material for: Centrally expressed Cav3.2 T-type calcium channel is critical for the initiation and maintenance of neuropathic pain
Source: eLife. 2022 Nov 23;11:e79018. doi: 10.7554/eLife.79018 (PMC9714965; doi:10.7554/eLife.79018)
Supplement: Figure 1—source data 1. [file elife-79018-fig1-data1.xlsx]

## Sheet: Feuil1
Quantification of Cav3.2-GFP and PV expressing neurons
Figure 1C & Supplementary 1
Quantification of GFP+ and PV+ APT neurons
Figure 1C & Supplementary 1C, D
Image #	Mouse	Sex	Age (days)	Brain slice	Nb GFP+ neurons	Nb PV+ neurons	Nb GFP+PV+	Nb GFP+PV- neurons	Nb PV+GFP- neurons	% co-labelled / GFP neurons	% co-labelled / PV neurons	% GFP+PV- neurons	% PV+GFP- neurons
1	KI101	Female	110	1	35	37	34	1	3	97.1429	91.8919	2.85714	8.10811
2	KI101	Female	110	4	42	42	39	3	3	92.8571	92.8571	7.14286	7.14286
3	KI101	Female	110	4	30	27	24	6	3	80	88.8889	20	11.1111
4	KI101	Female	110	5	42	39	38	4	1	90.4762	97.4359	9.52381	2.5641
5	KI101	Female	110	5	43	44	39	4	5	90.6977	88.6364	9.30233	11.3636
6	KI101	Female	110	6	30	25	24	6	1	80	96	20	4
7	KI101	Female	110	6	33	31	29	4	2	87.8788	93.5484	12.1212	6.45161
8	KI101	Female	110	7	45	40	37	8	3	82.2222	92.5	17.7778	7.5
9	KI101	Female	110	8	36	33	30	6	3	83.3333	90.9091	16.6667	9.09091
10	KI101	Female	110	9	53	52	48	5	4	90.566	92.3077	9.43396	7.69231
11	KI101	Female	110	9	60	55	55	5	0	91.6667	100	8.33333	0
12	KI101	Female	110	11	33	32	31	2	1	93.9394	96.875	6.06061	3.125
13	KI106	Male	124	1	40	45	39	1	6	97.5	86.6667	2.5	13.3333
14	KI106	Male	124	1	47	45	41	6	4	87.234	91.1111	12.766	8.88889
15	KI106	Male	124	3	46	40	37	9	3	80.4348	92.5	19.5652	7.5
16	KI106	Male	124	4	37	36	31	6	5	83.7838	86.1111	16.2162	13.8889
17	KI106	Male	124	4	32	31	30	2	1	93.75	96.7742	6.25	3.22581
18	KI106	Male	124	5	46	49	44	2	5	95.6522	89.7959	4.34783	10.2041
19	KI106	Male	124	6	28	26	19	9	7	67.8571	73.0769	32.1429	26.9231
20	KI106	Male	124	6	41	34	29	12	5	70.7317	85.2941	29.2683	14.7059
21	KI106	Male	124	7	31	18	17	14	1	54.8387	94.4444	45.1613	5.55556
22	KI106	Male	124	8	30	34	27	3	7	90	79.4118	10	20.5882
23	KI106	Male	124	8	43	40	38	5	2	88.3721	95	11.6279	5
24	KI159	Male	86	4	39	37	31	8	6	79.4872	83.7838	20.5128	16.2162
25	KI159	Male	86	4	36	38	36	0	2	100	94.7368	0	5.26316
26	KI159	Male	86	4	35	34	32	3	2	91.4286	94.1176	8.57143	5.88235
27	KI159	Male	86	5	44	45	42	2	3	95.4545	93.3333	4.54545	6.66667
28	KI159	Male	86	5	31	31	30	1	1	96.7742	96.7742	3.22581	3.22581
29	KI159	Male	86	6	44	33	32	12	1	72.7273	96.9697	27.2727	3.0303
30	KI159	Male	86	6	39	41	39	0	2	100	95.122	0	4.87805
31	KI159	Male	86	7	36	32	30	6	2	83.3333	93.75	16.6667	6.25
32	KI159	Male	86	7	43	44	41	2	3	95.3488	93.1818	4.65116	6.81818
33	KI159	Male	86	8	29	27	26	3	1	89.6552	96.2963	10.3448	3.7037
Quantification of GFP+ and NeuN+ APT neurons
Figure 1C & Supplementary 1A, D
Image #	Mouse	Sex	Age (days)	Brain slice	Nb GFP+ neurons	Nb NeuN+ neurons	% GFP+ neurons
1	KI144	Male	46	4	19	120	15.8333
2	KI144	Male	46	4	14	105	13.3333
3	KI144	Male	46	4	21	104	20.1923
4	KI144	Male	46	5	34	153	22.2222
5	KI144	Male	46	5	42	207	20.2899
6	KI144	Male	46	5	48	195	24.6154
7	KI144	Male	46	5	25	139	17.9856
8	KI144	Male	46	6	45	240	18.75
9	KI144	Male	46	6	33	172	19.186
10	KI144	Male	46	6	26	191	13.6126
11	KI144	Male	46	7	40	226	17.6991
12	KI144	Male	46	7	21	168	12.5
13	KI144	Male	46	7	31	170	18.2353
14	KI144	Male	46	7	32	165	19.3939
15	KI144	Male	46	7	43	189	22.7513
16	KI144	Male	46	7	22	145	15.1724
17	KI144	Male	46	8	39	178	21.9101
18	KI144	Male	46	8	20	170	11.7647
19	KI100	Female	110	1	43	180	23.8889
20	KI100	Female	110	1	34	139	24.4604
21	KI100	Female	110	4	46	192	23.9583
22	KI100	Female	110	4	33	168	19.6429
23	KI100	Female	110	5	33	196	16.8367
24	KI100	Female	110	5	49	215	22.7907
25	KI100	Female	110	7	40	175	22.8571
26	KI100	Female	110	7	36	179	20.1117
27	KI100	Female	110	8	36	161	22.3602
28	KI100	Female	110	8	30	153	19.6078
29	KI100	Female	110	9	41	193	21.2435
30	KI105	Male	123	1	30	185	16.2162
31	KI105	Male	123	2	23	121	19.0083
32	KI105	Male	123	4	45	188	23.9362
33	KI105	Male	123	4	30	168	17.8571
34	KI105	Male	123	5	36	182	19.7802
35	KI105	Male	123	5	29	179	16.2011
36	KI105	Male	123	6	40	171	23.3918
37	KI105	Male	123	6	35	181	19.337
38	KI105	Male	123	7	38	173	21.9653
39	KI105	Male	123	7	35	178	19.6629
40	KI105	Male	123	8	54	197	27.4112
41	KI105	Male	123	9	48	190	25.2632
42	KI105	Male	123	9	53	180	29.4444
Quantification of PV+ and NeuN+ APT neurons
Figure 1C & Supplementary 1B, D
Image #	Mouse	Sex	Age (days)	Brain slice	Nb PV+ neurons	Nb NeuN+ neurons	% GFP+ neurons
1	KI102	Female	110	2	19	257	7.393
2	KI102	Female	110	3	28	167	16.7665
3	KI102	Female	110	4	30	196	15.3061
4	KI102	Female	110	5	20	184	10.8696
5	KI102	Female	110	6	32	240	13.3333
6	KI102	Female	110	7	26	189	13.7566
7	KI102	Female	110	8	20	186	10.7527
8	KI102	Female	110	9	39	160	24.375
9	KI102	Female	110	11	32	213	15.0235
10	KI107	Male	124	3	52	219	23.7443
11	KI107	Male	124	3	25	98	25.5102
12	KI107	Male	124	5	37	152	24.3421
13	KI107	Male	124	5	37	169	21.8935
14	KI107	Male	124	6	32	190	16.8421
15	KI107	Male	124	6	44	215	20.4651
16	KI107	Male	124	7	34	224	15.1786
17	KI107	Male	124	7	28	215	13.0233
18	KI158	Male	86	1	34	216	15.7407
19	KI158	Male	86	1	32	267	11.985
20	KI158	Male	86	2	27	247	10.9312
21	KI158	Male	86	2	22	266	8.27068
22	KI158	Male	86	3	49	224	21.875
23	KI158	Male	86	3	32	219	14.6119
24	KI158	Male	86	5	50	232	21.5517
