# Supplementary material for: Centrally expressed Cav3.2 T-type calcium channel is critical for the initiation and maintenance of neuropathic pain
Source: eLife. 2022 Nov 23;11:e79018. doi: 10.7554/eLife.79018 (PMC9714965; doi:10.7554/eLife.79018)
Supplement: Figure 2—figure supplement 1—source data 1. [file elife-79018-fig2-figsupp1-data1.xlsx]

## Sheet: Feuil1
Mean firing rate (Hz)
Naive animals				Animals that have undergone a Spared nerve injury procedure
Ai32 x PV-Cre 1	Unit 1	2.7	4.1	Ai32 x PV-Cre SNI 1	Unit 1	2.1
Ai32 x PV-Cre 2	Unit 2	6.5	3.8	Ai32 x PV-Cre SNI 2	Unit 2	3.5
	Unit 3	3.5	3.3		Unit 3	9.4
Ai32 x PV-Cre 3	Unit 4	6.6	2.4	Ai32 x PV-Cre SNI 3	Unit 4	4.9
Ai32 x PV-Cre 4	Unit 5	3.2	7.2		Unit 5	12.3
Ai32 x PV-Cre 5	Unit 6	4.1	5.6	Ai32 x PV-Cre SNI 4	Unit 6	8.1
