# Supplementary material for: Centrally expressed Cav3.2 T-type calcium channel is critical for the initiation and maintenance of neuropathic pain
Source: eLife. 2022 Nov 23;11:e79018. doi: 10.7554/eLife.79018 (PMC9714965; doi:10.7554/eLife.79018)
Supplement: Figure 2—source data 1. [file elife-79018-fig2-data1.xlsx]

## Sheet: Feuil1
Mean firing rate (Hz)
Sham animals				Animals that have undergone a Spared nerve injury procedure
Ai32 x PV-Cre 1	Unit 1	3.2		Ai32 x PV-Cre SNI 1	Unit 1	4
	Unit 2	5.1			Unit 2	8
Ai32 x PV-Cre 2	Unit 3	9.2			Unit 3	13.5
	Unit 4	10.4		Ai32 x PV-Cre SNI 2	Unit 4	12
	Unit 5	9.1			Unit 5	10.5
	Unit 6	12.2			Unit 6	10.8
Ai32 x PV-Cre 3	Unit 7	10.01			Unit 7	9.5
	Unit 8	8.4			Unit 8	12.2
	Unit 9	10.5			Unit 9	9.1
	Unit 10	6.7		Ai32 x PV-Cre SNI 3	Unit 10	14.6
	Unit 11	14.4			Unit 11	13.1
Ai32 x PV-Cre 4	Unit 12	7.8			Unit 12	15
	Unit 13	8.4			Unit 13	16
	Unit 14	5.9		Ai32 x PV-Cre SNI 4	Unit 14	15
	Unit 15	9.25			Unit 15	14
	Unit 16	4.1			Unit 16	7
	Unit 17	12.3			Unit 17	11.6
Ai32 x PV-Cre 5	Unit 18	8.2			Unit 18	9.1
	Unit 19	5.9
	Unit 20	8.8
	Unit 21	6.7
Proportion of spikes in a burst (%)
Sham animals				Animals that have undergone a Spared nerve injury procedure
Ai32 x PV-Cre 1	Unit 1	13.2		Ai32 x PV-Cre SNI 1	Unit 1	17
	Unit 2	11.5			Unit 2	20
Ai32 x PV-Cre 2	Unit 3	9.4			Unit 3	22
	Unit 4	6.9		Ai32 x PV-Cre SNI 2	Unit 4	11.7
	Unit 5	7			Unit 5	15
	Unit 6	8.5			Unit 6	14
Ai32 x PV-Cre 3	Unit 7	14.5			Unit 7	9
	Unit 8	12.6			Unit 8	25
	Unit 9	8			Unit 9	34
	Unit 10	16.4		Ai32 x PV-Cre SNI 3	Unit 10	23
	Unit 11	20			Unit 11	29
Ai32 x PV-Cre 4	Unit 12	15.3			Unit 12	7
	Unit 13	22.4			Unit 13	28
	Unit 14	22.3		Ai32 x PV-Cre SNI 4	Unit 14	22
	Unit 15	11.4			Unit 15	16
	Unit 16	31.4			Unit 16	33
	Unit 17	7.7			Unit 17	24
Ai32 x PV-Cre 5	Unit 18	4.2			Unit 18	27
	Unit 19	22.9
	Unit 20	14.1
	Unit 21	8.5
Mean Spike frequency in bursts (Hz)
Sham animals				Animals that have undergone a Spared nerve injury procedure
Ai32 x PV-Cre 1	Unit 1	218		Ai32 x PV-Cre SNI 1	Unit 1	246
	Unit 2	248			Unit 2	270
Ai32 x PV-Cre 2	Unit 3	271			Unit 3	290
	Unit 4	255		Ai32 x PV-Cre SNI 2	Unit 4	277
	Unit 5	255			Unit 5	260
	Unit 6	228			Unit 6	280
Ai32 x PV-Cre 3	Unit 7	261			Unit 7	284
	Unit 8	249			Unit 8	266
	Unit 9	265			Unit 9	252
	Unit 10	242		Ai32 x PV-Cre SNI 3	Unit 10	272
	Unit 11	224			Unit 11	265
Ai32 x PV-Cre 4	Unit 12	252			Unit 12	244
	Unit 13	267			Unit 13	232
	Unit 14	228		Ai32 x PV-Cre SNI 4	Unit 14	248
	Unit 15	277			Unit 15	301
	Unit 16	256			Unit 16	305
	Unit 17	233			Unit 17	295
Ai32 x PV-Cre 5	Unit 18	264			Unit 18	284
	Unit 19	271
	Unit 20	240
	Unit 21	288
