# Supplementary material for: Centrally expressed Cav3.2 T-type calcium channel is critical for the initiation and maintenance of neuropathic pain
Source: eLife. 2022 Nov 23;11:e79018. doi: 10.7554/eLife.79018 (PMC9714965; doi:10.7554/eLife.79018)
Supplement: Figure 3—source data 1. [file elife-79018-fig3-data1.xlsx]

## Sheet: Figure 3 - source data 1
Figure 3 - source data 1 : excitability properties of PV+ neurons
Cell	Sexe	sag amplitude (mV)	maximal firing rate (Hz)	Number of spikes in a burst	minimal ISI in a burst (ms)
1	M	7	146	0
2	M	9	262	0
3	F	4	344	0
4	M	10	281	1
5	F	25	272	1
6	F	17.5	200	5	5.2
7	F	20	290	12	2.4
8	F	10	314	4	3.8
9	F	24	13	7	3.8
10	M	18	262	7	9
11	M	5	228	3	14
12	M	3	246	4	11
13	M	22	295	11	2.5
14	F	4	334	8	4.6
15	F	17	192	17	2
16	F	23	219	17	4.8
17	M	17	149	3	3.8
18	M	19	316	16	3
19	M	17	117	7	12
20	M	16	227	4	4
21	M	16	375	4	3
22	F	25	295	8	2.9
23	F	26	39	5	4.2
24	F	8.5	11	7	5.3
25	M	15	247	7	4.9
26	M	20	60	5	4.2
27	M	9	214	8	3.8
28	M	25	139	2	22
29	M	25	278	14	2.7
30	M	22	168	13	8.6
31	M	15	12	4	6
32	M	23	137	6	2.9
33	M	24	116	15	3.3
34	M	24	257	8	4.2
35	F	22	79	8	5.3
36	F	19	11	5	6.1
37	F	17	159	4	7
38	F	14	113	6	11
39	M	16	29	9	2.3
40	M	15	30	5	5.2
41	M	8	504	10	6.4
42	M	19	380	2	10
43	F	20	156	8	3.9
44	F	21	305	10	3.05
45	F	18	243	4	5.4
46	M	24	137	7	5.3
47	M	13	167	10	10.5
48	M	12	188	3	7.1
49	M	11	283	3	5.2
50	M	7	245	5	9.8
51	M	18	238	4	7.7
52	F	12	239	2	15.2
53	F	13	403	3	27
54	F	20	286	14	4.4
55	F	23	383	5	2.6
56	F	22	219	6	5.7
57	F	13	422	4	12.3
58	F	19	180	6	4
59	F	26	164	5	5.1
60	F	26	192	6	3.2
61	M	25		10	3.8
62	M	20.6		4	5.3
62 neurons recorded in slices from 24 mice (13 males and 11 females)
2.6 ± 0.9 neurons / mouse
