# Supplementary material for: Centrally expressed Cav3.2 T-type calcium channel is critical for the initiation and maintenance of neuropathic pain
Source: eLife. 2022 Nov 23;11:e79018. doi: 10.7554/eLife.79018 (PMC9714965; doi:10.7554/eLife.79018)
Supplement: Figure 3—source data 3. [file elife-79018-fig3-data3.xlsx]

## Sheet: Feuil1
Cell	Cav3.1	Cav3.2	Cav3.3	Vglut2	GAD65	GAD67
1
2
3
4
5
6
7
8
9
10
11
12
13
14
15
16
17
18
19
20
21
22
23
