# Supplementary material for: Centrally expressed Cav3.2 T-type calcium channel is critical for the initiation and maintenance of neuropathic pain
Source: eLife. 2022 Nov 23;11:e79018. doi: 10.7554/eLife.79018 (PMC9714965; doi:10.7554/eLife.79018)
Supplement: Figure 4—source data 1. [file elife-79018-fig4-data1.xlsx]

## Sheet: Figure 4 - source data 1
Figure 4 - source data 1 : Ni and TTA effects on burst propertie of PV+ neurons
cell	number of spikes in a burst			minimal ISI (ms)
	Ctr	Ni	TTA	Ctr	Ni	TTA
1	2	0		16
2	6	0		7.9
3	8	4		4	7
4	3	2		4.5	14
5	11	6		2.5	4.5
6	9	7	5	2.3	2.6	2.9
7	8	6	4	3.7	4.5	6
8	9	5	4	3.2	7.2	9
9	11		4	2		3
10	8		4	4.2		10
11	11		5	2.5		4.5
12	14		2	2.7		80
13	8		0	2.3
14	8		0	5
15	3		0	16
16	1		0
16 neurons recorded in slices from 11 mice (7 males and 4 females)
1 neuron / slice and 1.5 ± 0.7 neurons / mouse
