# Supplementary material for: Centrally expressed Cav3.2 T-type calcium channel is critical for the initiation and maintenance of neuropathic pain
Source: eLife. 2022 Nov 23;11:e79018. doi: 10.7554/eLife.79018 (PMC9714965; doi:10.7554/eLife.79018)
Supplement: Figure 4—source data 2. [file elife-79018-fig4-data2.xlsx]

## Sheet: Figure 4 - source data 2
Figure 4 - source data 2 : Ni and TTA effects on the rebound depolarization in PV+ neurons
cell	rebond depolarization (mV)
	Ctr	Ni	TTA
1	15		6.5
2	21		16
3	12.5		9.5
4	9.5		6
5	15		8
6	17.5	19	9
7	21.5	19.5	14.5
8	14.5	11.5	6.5
9	20	18.5	13.5
10	13	7	5.5
11	10.5	7	3
12	15.5	10	7
13	8	6
14	8.5	5
15	6.5	4
15 neurons recorded in slices from 7 mice (5 males and 2 females)
1 neuron / slice and 2.1 ± 0.4 neurons / mouse
