# Supplementary material for: Centrally expressed Cav3.2 T-type calcium channel is critical for the initiation and maintenance of neuropathic pain
Source: eLife. 2022 Nov 23;11:e79018. doi: 10.7554/eLife.79018 (PMC9714965; doi:10.7554/eLife.79018)
Supplement: Figure 4—source data 3. [file elife-79018-fig4-data3.xlsx]

## Sheet: Figure4 - source data 3
Figure 4 - source data 3 : burst properties of PV+ neurons in slices from sham and SNI mice
sham mice							SNI mice
cell	number of spikes in a burst		minimal ISI (ms)				cell	number of spikes in a burst		minimal ISI (ms)
	Ctr	Ni	Ctr	Ni				Ctr	Ni	Ctr	Ni
1	6	N.T.	4.8	N.T.			1	6	N.T.	2.8	N.T.
2	4	N.T.	3.4	N.T.			2	7	N.T.	3.4	N.T.
3	6	N.T.	3.5	N.T.			3	7	N.T.	3	N.T.
4	6	6	3.3	2.7			4	9	N.T.	3.6	N.T.
5	4	1	5				5	8	4	2.9	4.7
6	5	N.T.	4	N.T.			6	11	6	2.3	2.8
7	7	4	2.6	3.4			7	14	N.T.	5	N.T.
8	6	5	4.6	6.3			8	8	5	5.5	5.9
9	7	5	4.7	6.7			9	7	5	2.6	2.6
10	9	6	2.9	2.7			10	11	N.T.	3.4	N.T.
11	10	7	2.7	3.9			11	12	5	2.6	3.3
12	5	1	3				12	10	6	2.3	3.2
							13	10	3	3.3	4.8
N.T. : not tested							14	10	3	2.3	3.5
							15	6	6	5.7	6.5
12 neurons recorded in slices from 6 mice (4 males, 2 females)
1 neuron / slice and 2.0 ± 0.9 neurons / mouse							N.T. : not tested
							15 neurons recorded in slices from 7 mice (5 males, 2 females)
							1 neuron / slice and 2.1 ± 0.9 neurons / mouse
