# Supplementary material for: Centrally expressed Cav3.2 T-type calcium channel is critical for the initiation and maintenance of neuropathic pain
Source: eLife. 2022 Nov 23;11:e79018. doi: 10.7554/eLife.79018 (PMC9714965; doi:10.7554/eLife.79018)
Supplement: Figure 5—figure supplement 1—source data 1. [file elife-79018-fig5-figsupp1-data1.xlsx]

## Sheet: Feuil1
Characterization of preventive APT-Cav3.2 knock-out effect on mechanical sensitivity and locomotion
Supplementary 4
Von Frey assessement of preventive APT-Cav3.2 KO effect on mechanical sensitivity								Rotarod test of APT-Cav3.2 KO effect on motor coordination						Circular corridor test of APT-Cav3.2 KO effect on spontaneous locomotion
Supplementary 4B								Supplementary 4C						Supplementary 4D
Gender	Group	BL	D5	D7	D14	D21		Gender	Group	BL1	BL2	D21		Gender	Group	Quarter turns/120min
Male	KI	0.4559	0.0153	0.08055	0.009	0.009		Male	KI	180	177.667	152		Male	KI	562
Male	KI	0.2034	0.01855	0.009	0.0316	0.009		Male	KI	166	170.667	170.333		Male	KI	512
Male	KI	0.194112	0.0475	0.009	0.05475	0.009		Male	KI	180	180	146		Male	KI	582
Male	KI	0.30795	0.11275	0.03555	0.009	0.009		Male	KI	180	160.333	179.667		Male	KI	1078
Male	KI	0.2082	0.009	0.04845	0.1401	0.044		Male	KI	162.333	162	152.333		Male	KI	507
Male	KI	0.190875	0.06545	0.009	0.009	0.04935		Male	KI	180	180	170		Male	KI	674
Male	KI	0.217925	0.2192	0.0237	0.009	0.0242		Male	KI	180	180	180		Male	KI	733
Male	KI	0.400313	0.14635	0.12005	0.0301	0.0171		Male	KI	180	180	148.667		Male	KI	1050
Male	KI	0.294787	0.2791	0.2023	0.08475	0.009		Male	KI	180	174	170.667		Male	KI	615
Male	KI	0.312087	0.16585	0.26305	0.1173	0.0242		Male	KI	180	180	180		Male	KI	729
Male	KI	0.463075	0.2207	0.06605	0.0242	0.0517		Male	KI	180	180	180		Male	KI	892
Male	KI	0.2215	0.0659	0.039	0.07995	0.0609		Male	KI	147	160.667	170.333		Male	KI	791
Male	KI	0.2184	0.1345	0.176	0.0323	0.0523		Male	KI	180	180	180		Male	KI	239
Male	KI	0.2892	0.06665	0.06595	0.03325	0.009		Male	KI	163.667	180	142.333		Male	KI	514
Male	KI	0.40495	0.01875	0.029	0.04095	0.0281		Male	KI	178.667	179.667	180		Male	KI	676
Male	KI	0.160787	0.0795	0.009	0.02025	0.0281		Male	KI	165.667	180	180		Male	KI	707
Male	KI	0.2068	0.0167	0.0811	0.009	0.0497		Male	KI	170.333	180	178.333		Male	KI	784
Male	KI	0.299488	0.009	0.009	0.009	0.009		Male	KI	170.667	166.333	180		Male	KI	1150
Male	KI	0.231038	0.0383	0.009	0.009	0.009		Male	KI	169.667	180	180		Male	KI	914
Male	KO	0.223513	0.05395	0.0643	0.0549	0.0153		Male	KO	153	156.333	135.667		Male	KO	430
Male	KO	0.139837	0.0316	0.0153	0.0153	0.0643		Male	KO	154.333	162.333	165.667		Male	KO	443
Male	KO	0.511487	0.07715	0.1862	0.02295	0.0903		Male	KO	180	180	180		Male	KO	328
Male	KO	0.2047	0.1556	0.10375	0.07275	0.009		Male	KO	180	180	157.667		Male	KO	643
Male	KO	0.202638	0.1507	0.009	0.009	0.0671		Male	KO	155.667	160.333	172		Male	KO	1321
Male	KO	0.1616	0.0774	0.10375	0.0495	0.0153		Male	KO	180	174.667	171		Male	KO	667
Male	KO	0.206987	0.03995	0.009	0.03685	0.009		Male	KO	180	178.667	136.333		Male	KO	462
Male	KO	0.265925	0.03942	0.0594	0.1905	0.09725		Male	KO	180	180	180		Male	KO	1499
Male	KO	0.380562	0.3284	0.009	0.06075	0.0739		Male	KO	180	164	142.333		Male	KO	405
Male	KO	0.23825	0.024	0.05455	0.14885	0.0222		Male	KO	180	180	180		Male	KO	370
Male	KO	0.192163	0.2942	0.3688	0.24545	0.03645		Male	KO	170	152.667	177.333		Male	KO	911
Male	KO	0.19365	0.009	0.18285	0.0517	0.09585		Male	KO	178	179	176		Male	KO	995
Male	KO	0.123562	0.009	0.08545	0.0959	0.009		Male	KO	180	180	180		Male	KO	976
Male	KO	0.234212	0.23445	0.1052	0.0171	0.02055		Male	KO	180	180	180		Male	KO	1074
Male	KO	0.519813	0.1126	0.19285	0.0471	0.07475		Male	KO	179.667	180	180		Male	KO	389
Male	KO	0.1988	0.009	0.009	0.009	0.0281		Male	KO	174.667	176.333	180		Male	KO	676
Male	KO	0.224175	0.0589	0.009	0.009	0.03945		Male	KO	135.667	179.333	174.333		Male	KO	772
Male	KO	0.331912	0.11895	0.1675	0.0909	0.2348		Male	KO	179.333	176	180		Male	KO	868
Male	KO	0.383588	0.1126	0.12845	0.187	0.2465		Male	KO	180	166.333	177.333		Male	KO	661
Male	KO	0.315063	0.029	0.13155	0.23195	0.176		Male	KO	179	180	170.333		Male	KO	1259
Female	KI	0.147575	0.0309	0.026	0.009	0.009		Female	KI	180	153	164.667		Female	KI	801
Female	KI	0.293212	0.0426	0.009	0.0372	0.009		Female	KI	180	180	179		Female	KI	659
Female	KI	0.0913125	0.009	0.01855	0.03685	0.009		Female	KI	180	180	140.667		Female	KI	666
Female	KI	0.187187	0.1671	0.0934	0.05395	0.009		Female	KI	147.333	180	180		Female	KI	498
Female	KI	0.230975	0.0309	0.026	0.0221	0.009		Female	KI	177.667	180	180		Female	KI	633
Female	KI	0.180775	0.0801	0.0475	0.0323	0.026		Female	KI	180	180	172.333		Female	KI	1536
Female	KI	0.275525	0.03375	0.026	0.009	0.009		Female	KI	180	170	180		Female	KI	1460
Female	KI	0.116075	0.08635	0.0242	0.009	0.009		Female	KI	159	180	180		Female	KI	1237
Female	KI	0.100663	0.039	0.05345	0.02055	0.009		Female	KI	180	180	180		Female	KI	1144
Female	KI	0.408975	0.0171	0.009	0.0331	0.0759		Female	KI	179.667	180	180		Female	KI	876
Female	KI	0.205313	0.009	0.07285	0.03595	0.02175		Female	KI	180	167	179.667		Female	KI	723
Female	KI	0.308825	0.17935	0.2117	0.009	0.009		Female	KI	179.333	164	162.333		Female	KI	607
Female	KI	0.343387	0.1126	0.009	0.0281	0.0569		Female	KI	180	179.667	180		Female	KI	960
Female	KI	0.25145	0.078	0.0406	0.1023	0.009		Female	KI	176	180	166.333		Female	KI	1054
Female	KI	0.410787	0.03325	0.009	0.009	0.009		Female	KI	163.333	163	180		Female	KO	463
Female	KO	0.1668	0.0774	0.03295	0.07105	0.02795		Female	KO	167.333	148	157.667		Female	KO	779
Female	KO	0.165475	0.026	0.06545	0.009	0.0316		Female	KO	136	180	177		Female	KO	511
Female	KO	0.222788	0.17865	0.026	0.0451	0.0414		Female	KO	149	180	180		Female	KO	533
Female	KO	0.190662	0.0235	0.009	0.03685	0.03335		Female	KO	143.333	180	167		Female	KO	1299
Female	KO	0.149412	0.0801	0.07885	0.0475	0.1025		Female	KO	180	180	167.333		Female	KO	535
Female	KO	0.082975	0.04845	0.009	0.0572	0.009		Female	KO	180	180	129.333		Female	KO	752
Female	KO	0.2606	0.048	0.0708	0.1905	0.11445		Female	KO	170	180	180		Female	KO	1532
Female	KO	0.252613	0.183	0.0399	0.19955	0.0471		Female	KO	169.667	180	179.333		Female	KO	1186
Female	KO	0.258537	0.07775	0.0399	0.0394	0.0483		Female	KO	180	180	164		Female	KO	993
Female	KO	0.310163	0.02375	0.14095	0.04525	0.1918		Female	KO	180	180	180		Female	KO	1032
Female	KO	0.216913	0.009	0.009	0.009	0.0282		Female	KO	180	180	180		Female	KO	808
Female	KO	0.412312	0.1634	0.1193	0.2348	0.31775		Female	KO	180	165	169.333		Female	KO	1278
Female	KO	0.279125	0.0167	0.009	0.1229	0.0281		Female	KO	169.333	180	175		Female	KO	1296
Female	KO	0.305237	0.009	0.2642	0.05855	0.2593		Female	KO	179	180	180		Measurement:	Nb 1/4 turns in 120min
Measurement:	PWT (g)							Measurement:	Latency to fall (s)
