# Supplementary material for: Centrally expressed Cav3.2 T-type calcium channel is critical for the initiation and maintenance of neuropathic pain
Source: eLife. 2022 Nov 23;11:e79018. doi: 10.7554/eLife.79018 (PMC9714965; doi:10.7554/eLife.79018)
Supplement: Figure 5—source data 1. [file elife-79018-fig5-data1.xlsx]

## Sheet: Feuil1
Characterization of the effect of APT-Cav3.2 preventive or curative knock-out on neuropathic pain induced by SNI
Figure 4
Von Frey assessement of preventive APT-Cav3.2 KO effect on mechanical sensitivity (1st batch)											Von Frey assessement of curative APT-Cav3.2 KO effect on mechanical sensitivity
Figure 4B											Figure 4C
Gender	Group	BL pre-injection	BL post-injection	BL mean	D14	D21	D28	D35	D42		Gender	Group	BL	SNI	D7	D14	D21	D28	D35	D42	D56
Male	KI	0.814701	1.4	1.10735	0.361006	0.115914	0.094818	0.101426	0.142308		Male	KI	0.759619	0.0755205	0.0635588	0.0755205	0.0635588	0.0558527	0.0755205	0.0635588	0.196756
Male	KI	1.4	1.07056	1.23528	0.0681968	0.0755205	0.101426	0.45439	0.0690715		Male	KI	0.377603	0.0635588	0.0436532	0.0681968	0.0436532	0.0392794	0.052818	0.0558527	0.052818
Male	KI	1.69495	1.27969	1.48732	0.0681968	0.094818	0.142308	0.45439	0.094818		Male	KI	0.45439	0.0392794	0.0558527	0.196756	0.0328403	0.115914	0.196756	0.052818	0.0907126
Male	KI	1.06347	1.06347	1.06347	0.549788	0.295303	0.241557	0.237096	0.249497		Male	KI	0.501319	0.0755205	0.0328403	0.115914	0.094818	0.0558527	0.052818	0.0315871	0.0315871
Male	KI	0.759619	1.69495	1.22729	0.656806	0.295303	0.759619	0.295303	0.142308		Male	KI	0.852611	0.0558527	0.0755205	0.0755205	0.241557	0.052818	0.0837759	0.0775611	0.115914
Male	KI	0.755638	0.886976	0.821307	0.405377	0.241557	0.142308	0.052818	0.338981		Male	KI	0.549788	0.0392794	0.196756	0.0317612	0.0775611	0.0635588	0.0558527	0.115914	0.0558527
Male	KI	1.4	0.886976	1.14349	0.405377	0.241557	0.295303	0.295303	0.115914		Male	KI	0.755638	0.115914	0.0317612	0.0755205	0.0635588	0.052818	0.0317612	0.0558527	0.0635588
Male	KO	1.4	1.4	1.4	0.549788	0.501319	0.501319	0.759619	0.45439		Male	KI	0.501319	0.0907126	0.0681968	0.052818	0.0775611	0.0690715	0.0635588	0.196756	0.0755205
Male	KO	1.4	1.4	1.4	0.45439	0.501319	0.45439	0.63317	0.759619		Male	KI	0.377603	0.196756	0.115914	0.094818	0.0837759	0.196756	0.0317612	0.052818	0.094818
Male	KO	1.06347	0.759619	0.911543	0.241557	0.759619	0.211914	0.45439	0.852611		Male	KI	0.501319	0.0755205	0.0436532	0.0558527	0.115914	0.115914	0.0558527	0.0907126	0.295303
Male	KO	1.06347	1.4	1.23173	1.4	0.549788	0.814701	0.295303	0.759619		Male	KO	0.377603	0.0635588	0.052818	0.0635588	0.361006	0.295303	0.196756	0.361006	0.241557
Male	KO	1.4	1.4	1.4	0.241557	0.295303	0.755638	0.094818	0.510549		Male	KO	0.755638	0.0392794	0.115914	0.0392794	0.0907126	0.28221	0.45439	0.115914	0.295303
Male	KO	1.4	1.4	1.4	1.4	1.69495	1.4	0.759619	1.69495		Male	KO	0.45439	0.0558527	0.0436532	0.0775611	0.052818	0.241557	0.115914	0.361006	0.334225
Female	KI	1.06347	1.06347	1.06347	0.712842	0.295303	0.142308	0.442954	0.249497		Male	KO	0.755638	0.0755205	0.0635588	0.115914	0.361006	0.28221	0.241557	0.28221	0.295303
Female	KI	1.4	1.69495	1.54748	0.235651	0.0837759	0.295303	0.115914	0.115914		Male	KO	0.852611	0.0328403	0.0328403	0.0436532	0.115914	0.115914	0.142308	0.115914	0.196756
Female	KI	1.4	1.4	1.4	0.45439	0.115914	0.295303	0.094818	0.115914		Male	KO	0.614372	0.115914	0.0907126	0.094818	0.237096	0.361006	0.241557	0.28221	0.377603
Female	KI	1.4	1.4	1.4	0.094818	0.0837759	0.142308	0.0837759	0.295303		Male	KO	0.759619	0.0681968	0.0328403	0.241557	0.142308	0.094818	0.28221	0.295303	0.338981
Female	KI	1.27969	1.07056	1.17513	0.0681968	0.295303	0.115914	0.115914	0.115914		Male	KO	0.63317	0.094818	0.0775611	0.115914	0.094818	0.142308	0.241557	0.241557	0.361006
Female	KI	1.69495	0.917426	1.30619	0.0837759	0.0681968	0.115914	0.295303	0.142308		Male	KO	0.549788	0.0755205	0.0558527	0.0317612	0.0558527	0.115914	0.295303	0.142308	0.211914
Female	KI	1.4	1.4	1.4	0.142308	0.142308	0.0837759	0.101426	0.0390643		Male	KO	0.377603	0.45439	0.094818	0.0635588	0.142308	0.361006	0.338981	0.377603	0.094818
Female	KI	1.4344	1.19345	1.31393	0.211914	0.0690715	0.405377	0.241557	0.0775611		Female	KI	0.45439	0.0635588	0.0775611	0.0635588	0.0907126	0.0635588	0.0436532	0.0592739	0.0635588
Female	KI	1.26016	1.4	1.33008	0.211914	0.101426	0.142308	0.295303	0.142308		Female	KI	0.501319	0.0907126	0.115914	0.0775611	0.0755205	0.094818	0.115914	0.094818	0.0755205
Female	KO	1.4	1.4	1.4	0.759619	0.755638	1.4	0.468294	0.115914		Female	KI	0.338981	0.28221	0.0635588	0.0907126	0.0558527	0.295303	0.0907126	0.115914	0.196756
Female	KO	1.02457	0.814701	0.919638	0.45439	0.45439	0.338981	0.28221	0.712842		Female	KI	0.755638	0.0558527	0.0558527	0.0690715	0.0635588	0.115914	0.0775611	0.052818	0.142308
Female	KO	1.06347	1.27508	1.16927	0.852466	0.45439	0.45439	0.759619	0.712842		Female	KI	0.917426	0.046386	0.0392794	0.052818	0.0317612	0.052818	0.142308	0.0775611	0.094818
Female	KO	0.755638	1.69495	1.2253	1.4344	0.614372	0.717495	0.759619	0.852611		Female	KI	0.63317	0.0396868	0.052818	0.241557	0.241557	0.115914	0.107973	0.0635588	0.0837759
Female	KO	1.06347	0.759619	0.911543	0.237096	0.361006	0.115914	0.142308	0.115914		Female	KI	0.501319	0.052818	0.0775611	0.0690715	0.0392794	0.0436532	0.0558527	0.196756	0.052818
Female	KO	0.759619	0.63317	0.696394	0.463847	0.28221	0.338981	0.712842	0.759619		Female	KI	0.755638	0.0558527	0.241557	0.142308	0.0681968	0.0755205	0.094818	0.0635588	0.0755205
											Female	KI	0.759619	0.107973	0.0907126	0.0436532	0.052818	0.0558527	0.241557	0.0690715	0.115914
											Female	KO	0.338981	0.052818	0.0436532	0.142308	0.241557	0.115914	0.361006	0.241557	0.377603
											Female	KO	0.712842	0.052818	0.0315871	0.241557	0.211914	0.405377	0.241557	0.377603	0.295303
											Female	KO	0.852611	0.0775611	0.0392794	0.115914	0.115914	0.28221	0.295303	0.361006	0.142308
											Female	KO	0.501319	0.0681968	0.241557	0.115914	0.241557	0.17923	0.295303	0.28221	0.295303
											Female	KO	0.549788	0.0558527	0.0907126	0.0635588	0.142308	0.338981	0.28221	0.142308	0.28221
											Female	KO	0.712842	0.241557	0.0755205	0.115914	0.115914	0.115914	0.338981	0.196756	0.211914
Cold immersion test of preventive APT-Cav3.2 KO effect on cold sensitivity											Cold immersion test of curative APT-Cav3.2 KO effect on cold sensitivity
Figure 4D											Figure 4E
Gender	Group	BL pre-injection	BL post-injection	BL mean	D14	D21	D28	D35	D42		Gender	Group	BL	SNI	D14	D21	D28	D42	D56
Male	KI	19.285	17.615	18.45	17.87	12.675	14.93	13.515	13.2		Male	KI	16.36	13.14	11.485	13.07	13.61	12.8	12.695
Male	KI	18.335	16.975	17.655	12.615	13.015	13.43	13.485	13.36		Male	KI	18.27	14.505	13.995	13.3	12.165	12.13	14.635
Male	KI	17.825	17.02	17.4225	13.81	13.085	13.4	13.945	10.795		Male	KI	17.585	14.685	11.715	12.49	13.435	13.705	12.14
Male	KI	18.525	18.02	18.2725	19.59	13.06	15.34	13.925	12.885		Male	KI	18.275	14.265	14.68	13.485	13.31	13.5	11.92
Male	KI	18.9	18.42	18.66	14.845	13.625	14.03	12.82	13.33		Male	KI	16.765	13.535	12.26	11.34	13.52	13.17	10.9
Male	KI	18.735	17.09	17.9125	13.42	14.5	13.48	12.185	12.68		Male	KI	16.66	14.045	12.235	12.34	12.775	12.875	12.185
Male	KI	18.71	17.585	18.1475	12.12	14.435	11.775	12.08	13.655		Male	KI	18.68	14.19	14.35	13.905	13.765	14.085	13.165
Male	KO	19.505	20.875	20.19	15.67	19.05	20	19.095	19.24		Male	KI	18.565	13.705	12.64	13.835	12.805	13.035	11.28
Male	KO	18.39	17.965	18.1775	13.075	17.665	19.36	18.555	11.145		Male	KI	19.39	14.685	12.83	12.055	14.42	14.005	13.425
Male	KO	17.67	17.51	17.59	14.785	18.595	19.125	19.08	19.375		Male	KI	19.25	15.605	12.77	12.61	13.73	14.495	12.005
Male	KO	18.735	17.1	17.9175	11.265	13.45	10.91	18.52	17.02		Male	KO	15.79	14.42	11.57	15.575	14.385	14.48	17.84
Male	KO	18.27	17.12	17.695	18.96	18.17	17.765	17.335	17.5		Male	KO	17.165	12.83	11.755	14.93	18.305	17.855	17.285
Male	KO	18.085	17.81	17.9475	18.705	20.345	19.085	19.12	19.355		Male	KO	18.605	14.015	12.22	18.24	18.605	17.46	17.54
Male	KO	19.045	18.095	18.57	13.445	17.525	19.465	18.24	15.57		Male	KO	18.23	13.22	12.24	15.955	16.175	15.57	16.61
Female	KI	17.465	17.44	17.4525	16.82	12.64	13.36	12.525	12.155		Male	KO	18.26	15.355	12.035	15.235	17.245	17.505	17.45
Female	KI	17.685	16.915	17.3	14.08	13.02	12.865	12.905	12.095		Male	KO	18.135	13.72	13.025	15.155	16.71	16.92	17.085
Female	KI	18.76	18.77	18.765	13.64	14.085	14.01	13.705	19.54		Male	KO	18.195	14.685	13.275	16.855	16.28	17.87	17.845
Female	KI	18.045	16.03	17.0375	10.015	14.105	14.885	13.425	14.11		Male	KO	17.375	13.48	12.465	15.345	14.76	14.39	16.865
Female	KI	18.88	16.8	17.84	11.38	12.485	12.13	10.775	10.715		Male	KO	17.16	13.27	12.55	15.84	16.48	16.925	14.945
Female	KI	18.505	17.17	17.8375	13.28	13.62	12.64	13.415	12.39		Male	KO	18.21	13.56	11.42	14.42	18.05	15.27	16.545
Female	KI	18.32	18.6	18.46	13.53	12.545	12.73	14.495	11.975		Female	KI	15.455	13.605	13.875	10.505	10.475	10.795	10.77
Female	KI	18.51	18.095	18.3025	11.005	13.22	11.19	13.6	13.525		Female	KI	16.19	13.315	13.93	11.585	12.355	12.495	12.735
Female	KI	17.545	18.265	17.905	12.815	13.71	13.805	13.345	16.075		Female	KI	16.035	13.49	12.81	11.72	12.915	11	10.86
Female	KO	18.025	18.345	18.185	18.575	18.3	18.405	19.325	18.67		Female	KI	16.965	14.265	12.36	13.15	12.665	13.47	12.9
Female	KO	19.935	19.385	19.66	18.49	19.225	18.91	18.78	18.29		Female	KI	16.565	14.45	13.73	11.54	12.675	10.28	12.735
Female	KO	18.225	18.055	18.14	16.01	16.87	19.565	18.48	20.01		Female	KI	17.315	13.87	12.86	13.965	13.505	13.22	12.59
Female	KO	18.58	17.5	18.04	18.105	19.89	19.025	18.435	18.68		Female	KI	16.595	14.125	12.09	13.795	13.445	12.48	13.47
Female	KO	18.49	17.675	18.0825	17.88	14.37	11.475	11.145	17.6		Female	KI	17.515	13.655	13.195	12.55	13.56	12.97	12.205
Female	KO	20.045	17.85	18.9475	18.985	18.22	13.515	18.585	18.465		Female	KI	17.32	13.125	14.17	12.03	12.13	12.045	10.89
											Female	KO	15.715	13.925	13.07	15.965	19.825	17.565	17.95
											Female	KO	15.26	14.16	11.23	15.005	18.505	15.885	15.855
											Female	KO	16.19	14.15	13.785	16.75	19.835	18.49	17.68
											Female	KO	16.375	14.565	11.58	17.08	18.72	15.815	17.095
											Female	KO	17.25	13.17	12.345	13.19	18.015	16.405	17.53
											Female	KO	16.25	13.205	10.745	13.71	16.235	17.56	18.24
