# Supplementary figures and images for: Centrally expressed Cav3.2 T-type calcium channel is critical for the initiation and maintenance of neuropathic pain
Source: eLife journal article supplement (doi:10.7554/elife.79018), 2022-11-23

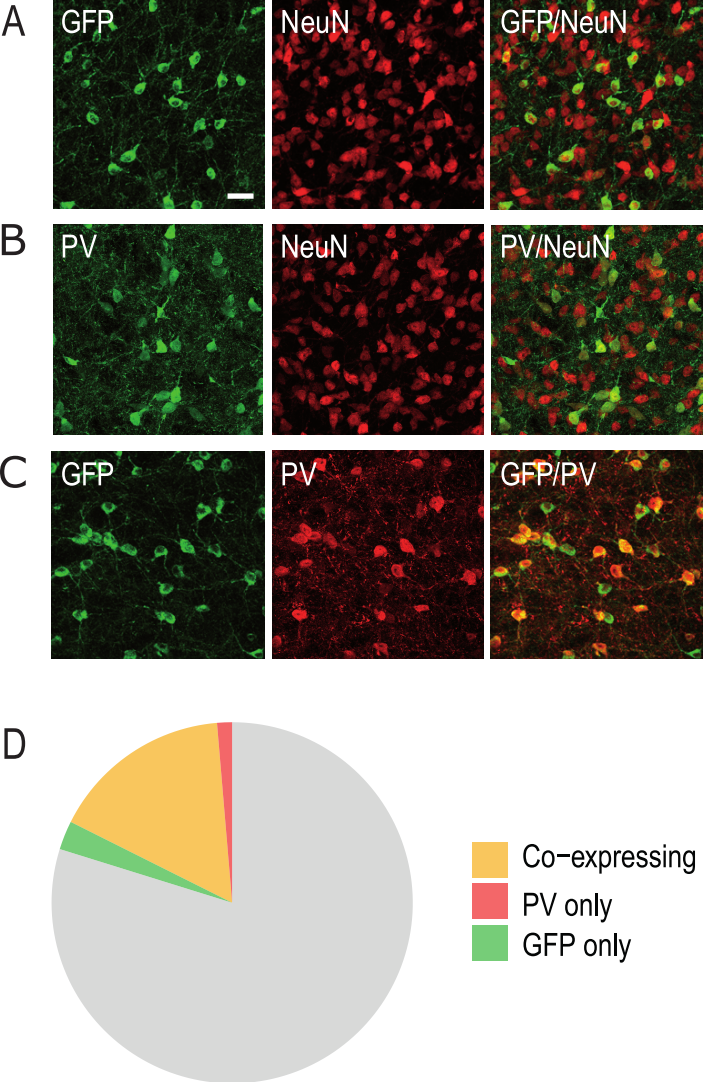

**Figure 1 - Figure supplement 1**

Supplement: supp [file elife_poa_e79018_Figure_1_figure_supplement_1.pdf › elife_poa_e79018_Figure_1_figure_supplement_1.pdf]

**A**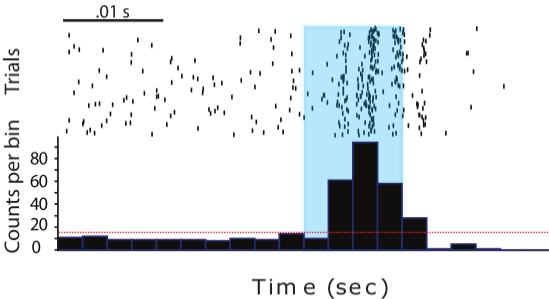**B**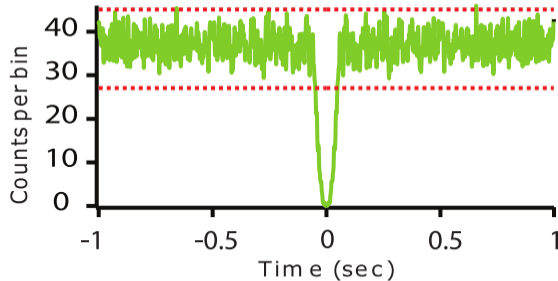

**Figure 2 - Figure supplement 1**

Supplement: supp [file elife_poa_e79018_Figure_2_figure_supplement_1.pdf › elife_poa_e79018_Figure_2_figure_supplement_1.pdf]

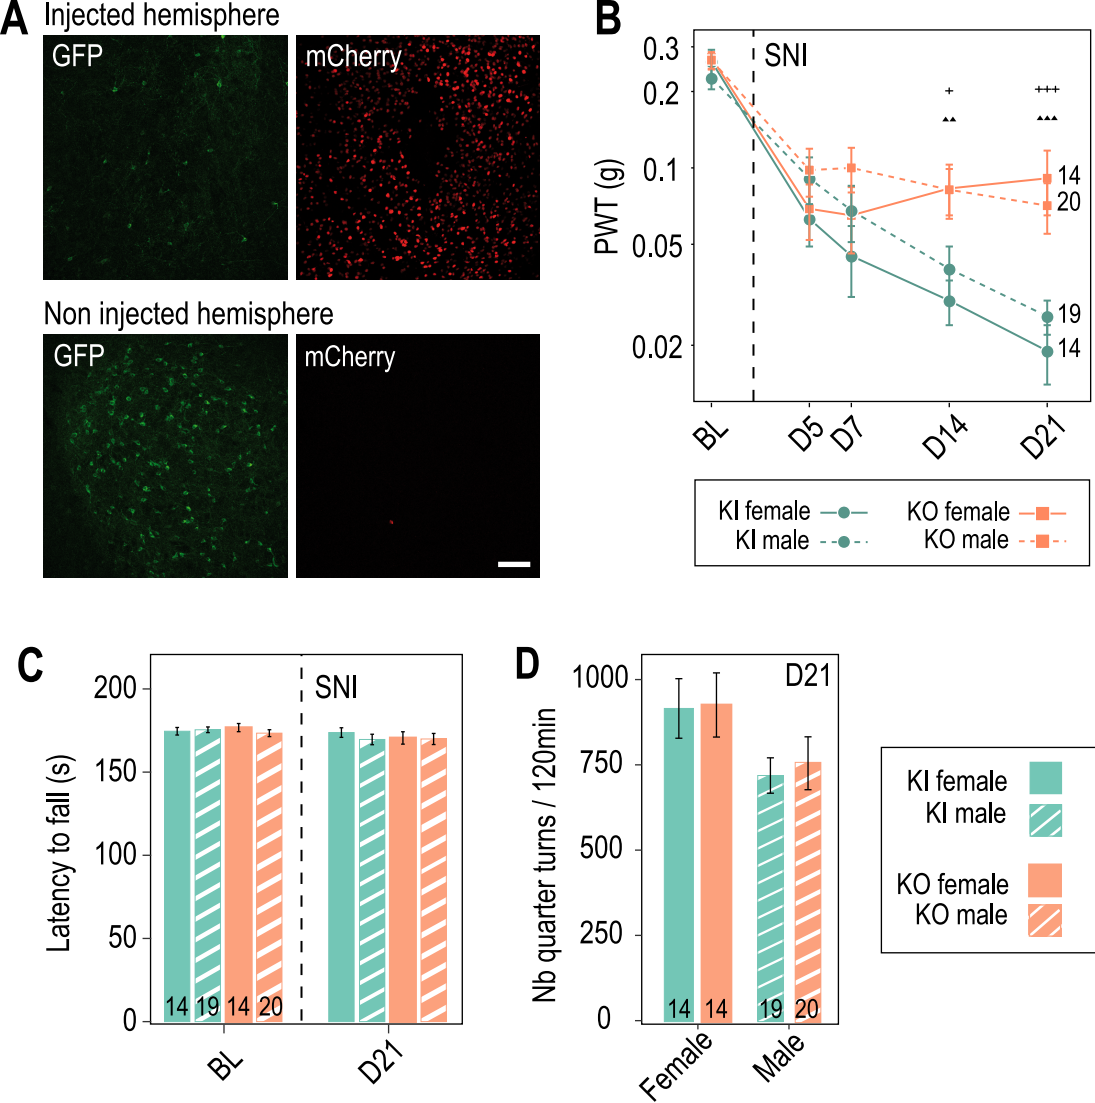

**Figure 5 - Figure supplement 1**

Supplement: supp [file elife_poa_e79018_Figure_5_figure_supplement_1.pdf › elife_poa_e79018_Figure_5_figure_supplement_1.pdf]
